# Supplementary material for: Theoretical insights into the thermoelectric transport performance of the MoP2Ga2S2 monolayer
Source: Royal Society of Chemistry journal article supplement (doi:10.1039/d4cp03860f), 2024-01-01
Supplement: d4cp03860f1.pdf [file d4cp03860f1.pdf]

# Theoretical insight into the thermoelectric transport performance of MoP<sub>2</sub>Ga<sub>2</sub>S<sub>2</sub> monolayer

Xin-Yu Wang <sup>a,1</sup>, Xin Yang <sup>a</sup>, Xiang-Hui Meng <sup>a</sup>, Yan-Qing Shen <sup>\*a,b,1</sup>, Yong Shuai <sup>\*c</sup>, Qing Ai <sup>\*c</sup>, Zhong-Xiang Zhou <sup>a,b</sup>

<sup>a</sup> School of Physics, Harbin Institute of Technology, Harbin 150001, People's Republic of China

<sup>b</sup> Heilongjiang Provincial Key Laboratory of Plasma Physics and Application Technology, Harbin Institute of Technology, Harbin 150001, People's Republic of China

<sup>c</sup> School of Energy Science and Engineering, Harbin Institute of Technology, Harbin 150001, People's Republic of China

<sup>1</sup> These authors contributed equally to this work.

## 1. The AIMD stimulation for MoP<sub>2</sub>Ga<sub>2</sub>S<sub>2</sub> monolayer at 1500 K.

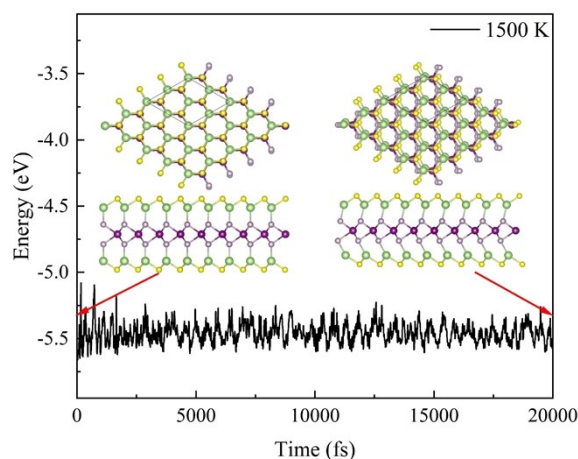

**Fig. S1** The ab-initio molecular dynamics (AIMD) simulation results of  $\text{MoP}_2\text{Ga}_2\text{S}_2$  monolayer at 1500 K. The AIMD runs for 20 ps with a time step of 1 fs.

**2. The energy band structures of monolayer  $\text{MoP}_2\text{Ga}_2\text{S}_2$  using PBE, PBE+SOC and HSE06**

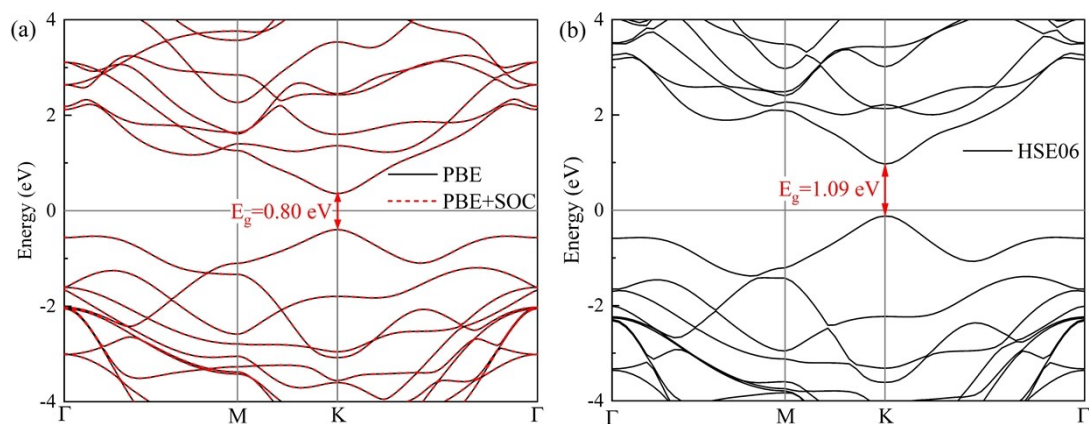

**Fig. S2** The energy band structure using (a) PBE and PBE+SOC, (b) HSE06 of  $\text{MoP}_2\text{Ga}_2\text{S}_2$  monolayer.

**3. The boundary scattering rate and isotopic scattering rate in the irreducible wedge of  $\text{MoP}_2\text{Ga}_2\text{S}_2$  monolayer**

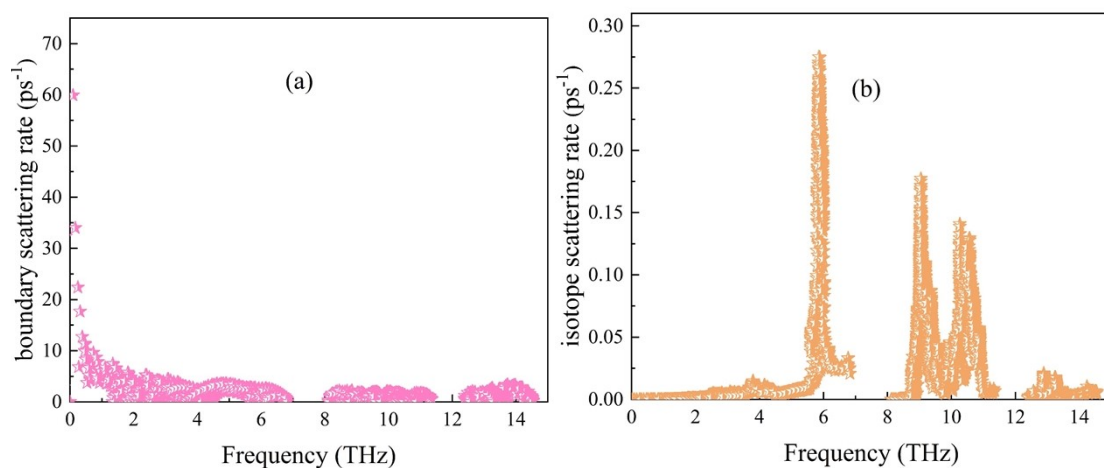

**Fig. S3** (a) The boundary scattering rate and (b) isotopic scattering rate of  $\text{MoP}_2\text{Ga}_2\text{S}_2$  monolayer.
